# Supplementary material for: Infectious Diseases and Tropical Cyclones in Southeast China
Source: MDPI journal article supplement (doi:10.3390/ijerph14050494), 2017-05-07
Supplement: s1 [file s1]

# Supplementary Materials: Infectious Diseases and Tropical Cyclones in Southeast China

Jietao Zheng, Weixiao Han, Baofa Jiang Wei Ma and Ying Zhang

**Table S1.** The information of 65 tropical cyclones affecting Guangdong, Hainan, Zhejiang, and Fujian province.

| Year | Dates      | The Order Number | Name of TC | Grade of TC           | Maximum Wind Speed (m/s) |
|------|------------|------------------|------------|-----------------------|--------------------------|
| 2005 | 7.11–7.21  | 5                | Haitang    | Typhoon               | 60                       |
|      | 7.29–8.1   | 8                | Washi      | Severe tropical storm | 25                       |
|      | 7.30–8.9   | 9                | Matsa      | Typhoon               | 45                       |
|      | 8.10–8.15  | 10               | Sanvn      | Severe tropical storm | 30                       |
|      | 8.26–9.3   | 13               | Talim      | Typhoon               | 55                       |
|      | 9.5–9.13   | 15               | Khanun     | Typhoon               | 50                       |
|      | 9.15–9.19  | 16               | Vicente    | Tropical storm        | 23                       |
|      | 9.19–9.27  | 18               | Damrey     | Typhoon               | 50                       |
|      | 9.25–10.3  | 19               | Longwang   | Typhoon               | 55                       |
|      | 10.28–11.2 | 21               | Kai-tak    | Typhoon               | 40                       |
| 2006 | 5.8–5.19   | 2                | Chanchu    | Severe typhoon        | 50                       |
|      | 6.24–6.29  | 3                | Jelawat    | Tropical storm        | 20                       |
|      | 6.29–7.13  | 4                | Ewiniar    | Super typhoon         | 55                       |
|      | 7.8–7.17   | 6                | Bilis      | Severe tropical storm | 30                       |
|      | 7.18–7.29  | 7                | Kaemi      | Typhoon               | 40                       |
|      | 7.28–8.5   | 8                | Prapiroon  | Typhoon               | 33                       |
|      | 8.5–8.12   | 10               | Saomai     | Super typhoon         | 60                       |
|      | 8.5–8.11   | 11               | Bopha      | Severe tropical storm | 25                       |
|      | 9.25–10.2  | 20               | Xangsane   | Severe typhoon        | 50                       |
| 2007 | 7.7–7.17   | 4                | Man-yi     | Super typhoon         | 55                       |
|      | 8.5–8.11   | 7                | Pabuk      | Severe tropical storm | 30                       |
|      | 8.6–8.9    | 8                | Wutip      | Tropical storm        | 20                       |
|      | 8.12–8.24  | 9                | Sepat      | Super typhoon         | 65                       |
|      | 9.15–9.20  | 13               | Wipha      | Super typhoon         | 55                       |
|      | 9.21–9.26  | 14               | Francisco  | Tropical storm        | 20                       |
|      | 9.29–10.5  | 15               | Lekima     | Typhoon               | 33                       |
|      | 10.1–10.10 | 16               | Krosa      | Super typhoon         | 55                       |
| 2008 | 4.14–4.20  | 2                | Neoguri    | Typhoon               | 40                       |
|      | 6.18–6.27  | 7                | Fengshen   | Severe typhoon        | 45                       |
|      | 7.13–7.23  | 8                | Kalmaegi   | Typhoon               | 33                       |
|      | 7.24–8.1   | 9                | Fung-wong  | Severe typhoon        | 45                       |
|      | 8.3–8.8    | 10               | Kammuri    | Severe tropical storm | 25                       |
|      | 8.17–8.23  | 13               | Nuri       | Typhoon               | 40                       |
|      | 9.8–9.22   | 15               | Sinlaku    | Super typhoon         | 55                       |
|      | 9.17–9.26  | 16               | Hagupit    | Severe typhoon        | 50                       |
|      | 9.24–10.5  | 17               | Jangmi     | Super typhoon         | 65                       |
|      | 9.29–10.6  | 19               | Higos      | Tropical storm        | 18                       |
| 2009 | 6.17–6.25  | 3                | Linfa      | Severe tropical storm | 30                       |
|      | 6.22–6.27  | 4                | Nangka     | Tropical storm        | 23                       |
|      | 7.10–7.13  | 5                | Soudelor   | Tropical storm        | 18                       |
|      | 7.15–7.19  | 7                | Molave     | Typhoon               | 38                       |
|      | 7.31–8.9   | 8                | Goni       | Severe tropical storm | 28                       |
|      | 8.3–8.13   | 9                | Morakot    | Typhoon               | 40                       |
|      | 9.9–9.12   | 14               | Mujigae    | Tropical storm        | 20                       |
|      | 9.13–9.16  | 16               | Koppu      | Typhoon               | 40                       |
|      | 9.25–10.1  | 17               | Ketsana    | Typhoon               | 40                       |
|      | 9.28–10.15 | 19               | Parma      | Super typhoon         | 55                       |

|      |             |    |          |                       |    |
|------|-------------|----|----------|-----------------------|----|
|      | 10.18–10.20 | 23 |          | Tropical depression   | 15 |
|      | 7.11–7.18   | 2  | Conson   | Typhoon               | 35 |
|      | 7.17–7.23   | 3  | Chanthu  | Typhoon               | 35 |
|      | 8.22–8.25   | 6  | Mindulle | Severe tropical storm | 30 |
|      | 8.27–9.4    | 7  | Lionrock | Severe tropical storm | 28 |
| 2010 | 8.29–9.1    | 9  | Namtheun | Tropical storm        | 18 |
|      | 9.7–9.14    | 11 | Meranti  | Typhoon               | 35 |
|      | 9.15–9.22   | 12 | Fanapi   | Super typhoon         | 52 |
|      | 10.4–10.10  | 14 | TD1002   | Tropical depression   | 15 |
|      | 10.13–10.24 | 15 | Megi     | Super typhoon         | 72 |
|      | 6.9–6.11    | 6  | Sarika   | Tropical storm        | 20 |
|      | 6.17–6.25   | 7  | Haima    | Tropical storm        | 20 |
|      | 6.21–6.27   | 8  | Meari    | Severe tropical storm | 30 |
| 2011 | 7.25–7.31   | 11 | Nock-ten | Severe tropical storm | 28 |
|      | 7.27–8.9    | 12 | Muifa    | Super typhoon         | 65 |
|      | 8.21–8.31   | 15 | Nanmadol | Super typhoon         | 60 |
|      | 9.23–10.1   | 21 | Nesat    | Severe typhoon        | 45 |
|      | 9.26–10.5   | 23 | Nalgae   | Severe typhoon        | 50 |

**Table S2.** Effects of low level TCs <sup>a</sup> (tropical depressions and tropical storms) on all analyzed infectious diseases in coastal cities.

| Diseases <sup>b</sup>            | Disease Frequencies in the Disaster Period/per Day × Hundred Million | Disease Frequencies in the Reference Period/per Day × Hundred Million | RR   | 95% CI    |
|----------------------------------|----------------------------------------------------------------------|-----------------------------------------------------------------------|------|-----------|
| Water-food transmitted           |                                                                      |                                                                       |      |           |
| Bacillary dysentery              | 12.64                                                                | 11.88                                                                 | 1.06 | 0.56–2.02 |
| Typhoid fever                    | 2.30                                                                 | 4.62                                                                  | 0.50 | 0.14–1.80 |
| Paratyphoid fever                | 7.59                                                                 | 4.18                                                                  | 1.82 | 0.69–4.79 |
| Other infectious diarrhea        | 29.67                                                                | 29.38                                                                 | 1.01 | 0.67–1.53 |
| Hepatitis A                      | 2.30                                                                 | 2.24                                                                  | 1.02 | 0.23–4.56 |
| Air transmitted                  |                                                                      |                                                                       |      |           |
| Influenza                        | 6.41                                                                 | 8.81                                                                  | 0.73 | 0.32–1.66 |
| Influenza A (H1N1)               | 9.30                                                                 | 7.45                                                                  | 1.25 | 0.57–2.73 |
| HFMD <sup>c</sup>                | 31.01                                                                | 32.48                                                                 | 0.95 | 0.64–1.42 |
| Measles                          | 7.91                                                                 | 10.28                                                                 | 0.77 | 0.36–1.63 |
| Rubella                          | 3.12                                                                 | 8.46                                                                  | 0.37 | 0.13–1.06 |
| Mumps                            | 8.21                                                                 | 10.21                                                                 | 0.80 | 0.38–1.70 |
| Varicella <sup>d</sup>           | 5.73                                                                 | 7.92                                                                  | 0.72 | 0.30–1.73 |
| Mosquito transmitted             |                                                                      |                                                                       |      |           |
| Vivax malaria                    | 6.07                                                                 | 8.91                                                                  | 0.68 | 0.29–1.58 |
| Nontypeable malaria              | 6.99                                                                 | 9.52                                                                  | 0.73 | 0.33–1.62 |
| Contact transmitted              |                                                                      |                                                                       |      |           |
| Acute hemorrhagic conjunctivitis | 65.17                                                                | 65.31                                                                 | 1.00 | 0.76–1.32 |

<sup>a</sup> tropical cyclones; <sup>b</sup> The numbers of reported cases of dengue fever from both disaster and reference periods were less than 10 and were not analyzed; <sup>c</sup> Hand, foot, mouth disease, also transmitted through water-food; <sup>d</sup> also transmitted through contact.

**Table S3.** Effects of high level TCs <sup>a</sup> (severe tropical storms and typhoons) on all analyzed infectious diseases in coastal cities.

| Diseases <sup>b</sup>            | Disease Frequencies<br>in the Disaster<br>Period/per Day ×<br>Hundred Million | Disease frequencies<br>in the Reference<br>Period/per Day ×<br>Hundred Million | RR   | 95% CI     |
|----------------------------------|-------------------------------------------------------------------------------|--------------------------------------------------------------------------------|------|------------|
| Water-food transmitted           |                                                                               |                                                                                |      |            |
| Bacillary dysentery              | 18.45                                                                         | 16.82                                                                          | 1.10 | 0.64–1.88  |
| Typhoid fever                    | 3.14                                                                          | 1.32                                                                           | 2.38 | 0.46–12.41 |
| Paratyphoid fever                | 5.33                                                                          | 3.30                                                                           | 1.62 | 0.53–4.93  |
| Other infectious diarrhea        | 27.56                                                                         | 25.62                                                                          | 1.08 | 0.70–1.67  |
| Hepatitis A                      | 3.53                                                                          | 2.20                                                                           | 1.60 | 0.41–6.30  |
| Air transmitted                  |                                                                               |                                                                                |      |            |
| Influenza                        | 6.19                                                                          | 5.69                                                                           | 1.09 | 0.43–2.74  |
| Influenza A (H1N1)               | 2.39                                                                          | 6.60                                                                           | 0.36 | 0.11–1.21  |
| HFMD <sup>c</sup>                | 83.97                                                                         | 88.36                                                                          | 0.95 | 0.75–1.21  |
| Measles                          | 3.35                                                                          | 4.62                                                                           | 0.73 | 0.23–2.28  |
| Mumps                            | 10.42                                                                         | 14.17                                                                          | 0.74 | 0.38–1.41  |
| Varicella <sup>d</sup>           | 5.70                                                                          | 5.28                                                                           | 1.08 | 0.41–2.83  |
| Mosquito transmitted             |                                                                               |                                                                                |      |            |
| Vivax malaria                    | 17.96                                                                         | 21.44                                                                          | 0.84 | 0.50–1.39  |
| Nontypeable malaria              | 4.75                                                                          | 5.61                                                                           | 0.85 | 0.31–2.29  |
| Contact transmitted              |                                                                               |                                                                                |      |            |
| Acute hemorrhagic conjunctivitis | 11.76                                                                         | 18.91                                                                          | 0.62 | 0.34–1.12  |

<sup>a</sup> tropical cyclones; <sup>b</sup> The numbers of reported cases of dengue fever and rubella from both disaster and reference periods were less than 10 and were not analyzed; <sup>c</sup> Hand, foot, mouth disease, also transmitted through water-food; <sup>d</sup> also transmitted through contact;.

**Table S4.** Effects of low level TCs <sup>a</sup> (tropical depressions and tropical storms) on all analyzed infectious diseases in non-coastal cities.

| Diseases <sup>b</sup>            | Disease Frequencies<br>in the Disaster<br>Period/per Day ×<br>Hundred Million | Disease Frequencies<br>in the Reference<br>Period/per Day ×<br>Hundred Million | RR    | 95% CI     |
|----------------------------------|-------------------------------------------------------------------------------|--------------------------------------------------------------------------------|-------|------------|
| Water-food transmitted           |                                                                               |                                                                                |       |            |
| Bacillary dysentery              | 34.13                                                                         | 28.39                                                                          | 1.20  | 0.58–2.48  |
| Paratyphoid fever                | 14.32                                                                         | 2.10                                                                           | 6.81  | 0.84–55.57 |
| Other infectious diarrhea        | 48.95                                                                         | 48.47                                                                          | 1.01  | 0.57–1.80  |
| Air transmitted                  |                                                                               |                                                                                |       |            |
| Influenza                        | 20.08                                                                         | 12.89                                                                          | 1.56  | 0.57–4.30  |
| Influenza A (H1N1)               | 22.60                                                                         | 2.10                                                                           | 10.75 | 1.39–83.43 |
| HFMD <sup>c</sup>                | 59.10                                                                         | 62.81                                                                          | 0.94  | 0.56–1.58  |
| Measles                          | 14.61                                                                         | 20.42                                                                          | 0.72  | 0.27–1.89  |
| Mumps                            | 23.57                                                                         | 31.73                                                                          | 0.74  | 0.34–1.61  |
| Varicella <sup>d</sup>           | 16.04                                                                         | 15.98                                                                          | 1.00  | 0.37–2.74  |
| Mosquito transmitted             |                                                                               |                                                                                |       |            |
| Dengue fever                     | 11.69                                                                         | 10.51                                                                          | 1.11  | 0.33–3.72  |
| Contact transmitted              |                                                                               |                                                                                |       |            |
| Acute hemorrhagic conjunctivitis | 194.33                                                                        | 155.03                                                                         | 1.25  | 0.92–1.70  |

<sup>a</sup> tropical cyclones; <sup>b</sup> The numbers of reported cases of typhoid fever, hepatitis A, rubella, vivax malaria and nontypeable malaria from both disaster and reference periods were less than 10 and were not analyzed; <sup>c</sup> Hand, foot, mouth disease, also transmitted through water-food; <sup>d</sup> also transmitted through contact.

**Table S5.** Effects of high level TCs <sup>a</sup> (severe tropical storms and typhoons) on all analyzed infectious diseases in non-coastal cities.

| Diseases <sup>b</sup>     | Disease Frequencies<br>in the Disaster<br>Period/per Day ×<br>Hundred Million | Disease Frequencies<br>in the Reference<br>Period/per Day ×<br>Hundred Million | RR    | 95% CI      |
|---------------------------|-------------------------------------------------------------------------------|--------------------------------------------------------------------------------|-------|-------------|
| Water-food transmitted    |                                                                               |                                                                                |       |             |
| Bacillary dysentery       | 71.41                                                                         | 56.77                                                                          | 1.26  | 0.76–2.08   |
| Other infectious diarrhea | 125.27                                                                        | 117.05                                                                         | 1.07  | 0.74–1.54   |
| Air transmitted           |                                                                               |                                                                                |       |             |
| Influenza                 | 19.72                                                                         | 0.69                                                                           | 28.13 | 0.89–890.07 |
| Mumps                     | 33.87                                                                         | 48.36                                                                          | 0.7   | 0.37–1.32   |

<sup>a</sup> tropical cyclones; <sup>b</sup> The numbers of reported cases of typhoid fever, paratyphoid fever, hepatitis A, influenza A (H1N1), HFMD, measles, rubella, varicella, vivax malaria, nontypeable malaria, acute hemorrhagic conjunctivitis and dengue fever from both disaster and reference periods were less than 10 and were not analyzed.

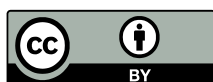

© 2017 by the authors; licensee MDPI, Basel, Switzerland. This article is an open access article distributed under the terms and conditions of the Creative Commons by Attribution (CC-BY) license (<http://creativecommons.org/licenses/by/4.0/>).
